# Supplementary material for: Predictors of CNS-Active Medication Use and Polypharmacy Among Homebound Older Adults With Depression
Source: Atypon-hosted journal article supplement (doi:10.1176/appi.ps.201900551), 2020-04-28
Supplement: appi.ps.201900551.ds001.pdf [file appi.ps.201900551.ds001.pdf]

**Supplemental Table 1.** Participant characteristics.

| <b>Variable</b>                 | <b>N</b>       | <b>%</b> |
|---------------------------------|----------------|----------|
| Age (yrs; M $\pm$ SD)           | 67.5 $\pm$ 8.9 |          |
| Age range (yrs)                 |                |          |
| 50-59.99                        | 66             | 23.8     |
| 60-69.99                        | 106            | 38.3     |
| 70-79.99                        | 78             | 28.2     |
| 80+                             | 27             | 9.8      |
| Gender                          |                |          |
| Female                          | 193            | 69.7     |
| Male                            | 84             | 30.3     |
| Race/ethnicity                  |                |          |
| Non-Hispanic White              | 113            | 40.8     |
| Non-Hispanic Black              | 83             | 30.0     |
| Hispanic                        | 81             | 29.2     |
| Living alone                    | 138            | 49.8     |
| Education                       |                |          |
| <High school                    | 73             | 26.4     |
| High school diploma             | 45             | 16.2     |
| Some college/associate's degree | 92             | 33.3     |
| Bachelor's degree or higher     | 67             | 24.2     |
| Household income                |                |          |
| Up to \$15,000                  | 150            | 54.2     |
| \$15,001-\$25,000               | 73             | 26.4     |
| \$25,001-\$35,000               | 32             | 11.6     |

|                                                                   |                 |      |
|-------------------------------------------------------------------|-----------------|------|
| \$35,001 or higher                                                | 22              | 7.9  |
| Self-rated financial status                                       |                 |      |
| Cannot make ends meet/just about manage to get by                 | 230             | 83.0 |
| Have enough to get along, even a little extra                     | 42              | 15.2 |
| Money is not a problem; can buy anything I want to.               | 5               | 1.8  |
| No. of chronic illnesses (M $\pm$ SD)                             | 3.8 $\pm$ 1.6   |      |
| No. of ADL impairments (M $\pm$ SD)                               | 1.9 $\pm$ 1.6   |      |
| No. of IADL impairments (M $\pm$ SD)                              | 3.0 $\pm$ 1.4   |      |
| Emergency department visit in the past 6 months                   | 83              | 30.1 |
| Overnight hospitalization                                         | 42              | 15.2 |
| WHODAS 2.0 (disability) (0 [none]-48 [extreme]) (M $\pm$ SD)      | 23.3 $\pm$ 9.1  |      |
| Perceived social support (12 [lowest]-84 [highest]) (M $\pm$ SD)  | 53.1 $\pm$ 18.1 |      |
| 24-item HAMD score (M $\pm$ SD)                                   | 23.0 $\pm$ 5.7  |      |
| Pain intensity (in the past 6 months; 0-10 scale) (M $\pm$ SD)    | 6.5 $\pm$ 2.5   |      |
| Pain interference (in the past 6 months; 0-10 scale) (M $\pm$ SD) | 6.5 $\pm$ 2.9   |      |
| Pain frequency (in the past 6 months; 0-10 scale) (M $\pm$ SD)    | 7.7 $\pm$ 2.9   |      |
| Pain rating (current; 0-10 scale) (M $\pm$ SD)                    | 5.0 $\pm$ 2.9   |      |

Note: M=mean; SD=standard deviation of the mean; HAMD=Hamilton Rating Scale for Depression; ADL=activities of daily living; IADL=instrumental activities of daily living; WHODAS=World Health Organization Disability Assessment Schedule

**Supplemental Table 2.** Psychotropic and pain reliever medication use.

| Medication group                               | Rate of use   |      | Length of use among users (yrs) |        |         |
|------------------------------------------------|---------------|------|---------------------------------|--------|---------|
|                                                | N             | %    | M $\pm$ SD                      | Median | Range   |
| Antipsychotic                                  | 10            | 3.6  | 3.6 $\pm$ 2.8                   | 3.5    | 0.2-9.3 |
| Antidepressant                                 | 142           | 51.3 | 5.8 $\pm$ 6.3                   | 3.3    | 0.3-37  |
| SSRI                                           | 82            | 29.6 |                                 |        |         |
| SNRI                                           | 41            | 14.8 |                                 |        |         |
| Atypical                                       | 30            | 10.8 |                                 |        |         |
| Tricyclic                                      | 5             | 1.8  |                                 |        |         |
| Anxiolytic                                     | 66            | 23.8 | 7.5 $\pm$ 7.9                   | 4.4    | 0.5-34  |
| Benzodiazepines                                | 62            | 22.4 |                                 |        |         |
| Buspirone                                      | 6             | 2.2  |                                 |        |         |
| Sedative-hypnotic/sleep                        | 57            | 20.6 | 5.2 $\pm$ 6.7                   | 2.8    | 0.5-34  |
| Sedative hypnotics                             | 33            | 11.9 |                                 |        |         |
| Trazodone                                      | 22            | 7.9  |                                 |        |         |
| Melatonin                                      | 6             | 2.2  |                                 |        |         |
| Analgesic                                      | 169           | 61.0 | 4.8 $\pm$ 5.3                   | 3.2    | 0.01-32 |
| Opioid                                         | 115           | 41.5 | 4.7 $\pm$ 5.2                   | 3.2    | 0.01-32 |
| NSAID                                          | 100           | 36.1 | 4.8 $\pm$ 5.2                   | 2.9    | 0.01-23 |
| Total no. of above medication use (M $\pm$ SD) | 2.0 $\pm$ 1.6 |      |                                 |        |         |
| 0                                              | 63            | 22.7 |                                 |        |         |
| 1                                              | 50            | 18.1 |                                 |        |         |
| 2                                              | 64            | 23.1 |                                 |        |         |
| 3                                              | 46            | 16.6 |                                 |        |         |
| 4                                              | 33            | 11.9 |                                 |        |         |

|                                                |         |      |  |  |  |
|------------------------------------------------|---------|------|--|--|--|
| 5-7                                            | 21      | 7.6  |  |  |  |
| Total no. of CNS-active medications*<br>(M±SD) | 1.3±1.3 |      |  |  |  |
| 0                                              | 97      | 35.0 |  |  |  |
| 1                                              | 77      | 27.8 |  |  |  |
| 2                                              | 58      | 20.9 |  |  |  |
| 3                                              | 31      | 11.2 |  |  |  |
| 4-6                                            | 14      | 5.1  |  |  |  |

Note: M=mean; SD=standard deviation of the mean; Me=Median;

For each medication class or type, participants who were taking 2 or 3 medications from the same class (e.g., SSRI) were counted only once

\*Antipsychotics, benzodiazepines, nonbenzodiazepine benzodiazepine receptor agonists, selective serotonin reuptake inhibitors; tricyclic antidepressants, and opioids.

SSRI = selective serotonin reuptake inhibitor; SNRI = serotonin and norepinephrine reuptake inhibitors;

NSAID = nonsteroidal anti-inflammatory drug;

**Supplemental Table 3.** Associations among medication groups: Results from logistic regression analysis (N=245).

|                                                                                      | Antidepressant use                |            |       | Opioid use       |           |       |
|--------------------------------------------------------------------------------------|-----------------------------------|------------|-------|------------------|-----------|-------|
|                                                                                      | OR                                | 95% CI     | p     | OR               | 95% CI    | p     |
| Antipsychotic medication use (vs. nonuse)                                            | 0.53                              | .11-2.54   | .427  | 2.52             | .52-12.17 | .251  |
| Antidepressant medication use (vs. nonuse)                                           |                                   |            |       | 1.99             | 1.06-3.74 | .031  |
| Benzodiazepine use (vs. nonuse)                                                      | 1.20                              | .58-2.48   | .630  | 3.36             | 1.65-6.84 | .001  |
| Sedative-hypnotic/sleep medication use (vs. nonuse)                                  | 5.04                              | 2.11-12.05 | <.001 | 1.87             | .85-4.11  | .119  |
| Opioid use (vs. nonuse)                                                              | 1.87                              | .99-3.53   | .053  |                  |           |       |
| NSAID use (vs. nonuse)                                                               | 2.32                              | 1.25-4.32  | .008  | 1.06             | .57-1.98  | .855  |
| Age                                                                                  | 1.00                              | .96-1.03   | .774  | 1.00             | .96-1.03  | .809  |
| Female (vs. male)                                                                    | 1.69                              | .88-3.27   | .117  | 0.83             | .43-1.63  | .597  |
| African American (vs. non-Hispanic White)                                            | 0.72                              | .35-1.51   | .391  | 1.00             | .47-2.12  | 1.000 |
| Hispanic (vs. non-Hispanic White)                                                    | 0.85                              | .40-1.77   | .658  | 0.92             | .43-1.94  | .817  |
| Bachelor's degree (vs. no bachelor's degree)                                         | 1.44                              | .70-2.95   | .322  | 0.93             | .45-1.90  | .834  |
| Cannot make ends meet/just manage to get by (vs. have enough/money is not a problem) | 0.31                              | .13-.71    | .006  | 1.20             | .53-2.72  | .662  |
| No. of chronic illnesses                                                             | 1.07                              | .88-1.30   | .493  | 1.38             | 1.14-1.67 | .001  |
| ED visit (vs. no visit)                                                              | 1.20                              | .63-2.30   | .574  | 0.66             | .34-1.28  | .219  |
| Disability (WHODAS score)                                                            | 0.99                              | .95-1.02   | .486  | 1.04             | 1.00-1.08 | .050  |
| Perceived social support                                                             | 1.00                              | .98-1.02   | .929  | 1.00             | .99-1.02  | .764  |
| HAMD score                                                                           | 1.02                              | .96-1.08   | .601  | 0.98             | .92-1.03  | .180  |
| Pain intensity                                                                       | 1.02                              | .90-1.16   | .742  | 1.25             | 1.12-1.40 | .031  |
| Model statistics                                                                     | Likelihood ratio $\chi^2=55.83$ ; |            |       | Likelihood ratio |           |       |

|  |               |                                |
|--|---------------|--------------------------------|
|  | df=17; p<.001 | $\chi^2=56.01$ ; df=17; p<.001 |
|--|---------------|--------------------------------|

NSAID = nonsteroidal anti-inflammatory drug; ED = emergency department; WHODAS = World Health Organization Disability Assessment Schedule; HAMD = Hamilton Depression Rating Scale
